# Supplementary material for: CT of appendicoliths in adult appendicitis: clinical significance and characteristics of overlooked cases
Source: PubMed Central journal article supplement (PMC10957675; doi:10.1007/s00330-023-10273-3), 2023-10-14
Supplement: 330_2023_10273_MOESM1_ESM.pdf [file 330_2023_10273_MOESM1_ESM.pdf]

**CT of appendicoliths in adult appendicitis: clinical significance and characteristics of overlooked cases**

**Electronic Supplementary Material (ESM)**

### Supplementary Material 1: Definitions of CT findings and measurements

| Findings or measurements                   | Definitions                                                                                                                                                       |
|--------------------------------------------|-------------------------------------------------------------------------------------------------------------------------------------------------------------------|
| Appendix diameter                          | Outer-to-outer wall shortest diameter of appendix measured in the axial CT images that were perpendicular to the appendix's axis.                                 |
| Appendicolith                              | A hyperattenuating focus with a diameter >2 mm located either inside the appendiceal lumen or outside in fluid or fluid collection.                               |
| Representative appendicolith               | In a patient with >1 appendicoliths, the largest appendicolith in terms of maximum diameter was selected as representative of all appendicoliths in that patient. |
| Type of appendicolith                      | Please see the subsection "Categorization of appendicoliths by machine learning"                                                                                  |
| Obstructive appendicolith                  | Appendicolith with dilation of the upstream appendix diameter equal to or greater than that of the appendicolith itself                                           |
| Location of appendicolith                  | The location was described as being in the proximal 1/3, middle 1/3, or distal 1/3 of the appendix based on its position relative to the length of the appendix.  |
| Size of appendicolith                      | Determined by measuring appendicolith's maximum and minimum diameter, cross-sectional area, and perimeter.                                                        |
| CT attenuation of appendicolith            | Determined by measuring appendicolith's median, maximum, and minimum values, and the difference between the maximum and minimum values.                           |
| CT attenuation of surrounding soft tissues | Determined by measuring surrounding soft tissues' median, maximum, and minimum values                                                                             |

**Supplementary Material 2: Computed tomographic characteristics of appendicoliths not shown and shown on portovenous phase of adult patients with acute appendicitis (n=237)**

| <b>Characteristics</b>                                                             | <b>Appendicoliths not shown on portovenous phase (n=28)</b> | <b>Appendicoliths shown on portovenous phase (n=209)</b> | <b>p-values</b> |
|------------------------------------------------------------------------------------|-------------------------------------------------------------|----------------------------------------------------------|-----------------|
| <b>Type of appendicitis</b>                                                        |                                                             |                                                          | 0.750           |
| Uncomplicated                                                                      | 11 (39.3)                                                   | 93 (44.5)                                                |                 |
| Complicated                                                                        | 17 (60.7)                                                   | 116 (55.5)                                               |                 |
| <b>Type of appendicolith</b>                                                       |                                                             |                                                          | 0.263           |
| Type 0 (homogeneous, rounded)                                                      | 8 (28.6)                                                    | 87 (41.6)                                                |                 |
| Type 1 (heterogeneous, oval/oblong)                                                | 20 (71.4)                                                   | 122 (58.4)                                               |                 |
| <b>Obstructive appendicolith (n, %)</b>                                            | 14 (50.0)                                                   | 149 (71.3)                                               | 0.039           |
| <b>Homogeneous attenuation (n, %)</b>                                              | 25 (89.3)                                                   | 154 (73.7)                                               | 0.117           |
| <b>Location (n, %)</b>                                                             |                                                             |                                                          |                 |
| Proximal                                                                           | 13 (46.4)                                                   | 95 (45.5)                                                | 0.481           |
| Mid                                                                                | 10 (35.7)                                                   | 57 (27.3)                                                |                 |
| Distal                                                                             | 5 (17.9)                                                    | 57 (27.3)                                                |                 |
| <b>Size</b>                                                                        |                                                             |                                                          |                 |
| Maximum diameter (cm; median, range)                                               | 0.6 (0.3, 1.4)                                              | 0.7 (0.2, 2.4)                                           | 0.114           |
| Minimum diameter (cm; median, range)                                               | 0.4 (0.2, 0.8)                                              | 0.5 (0.2, 1.2)                                           | 0.098           |
| Maximum cross-sectional area (cm <sup>2</sup> ; median, range) (n=233)             | 0.3 (0.1, 8.0)                                              | 0.4 (0.1, 9.9)                                           | 0.229           |
| Ratio between appendicolith maximum diameter and appendix diameter (median, range) | 0.05 (0.03, 0.27)                                           | 0.05 (0.02, 0.21)                                        | 0.622           |
| Ratio between appendicolith minimum diameter and appendix diameter (median, range) | 0.04 (0.01, 0.26)                                           | 0.04 (0.01, 0.09)                                        | 0.433           |
| Perimeter (cm; median, range)                                                      | 1.8 (0.8, 3.4)                                              | 2.1 (0.6, 6.3)                                           | 0.145           |
| <b>CT attenuation (HU)</b>                                                         |                                                             |                                                          |                 |
| Mean (median, range)                                                               | 87.9 (-3.6, 139.4)                                          | 128.1 (1.7, 1528.0)                                      | <0.001          |
| Standard deviation (median, range)                                                 | 29.1 (17.1, 110.0)                                          | 53.2 (1.1, 3183.0)                                       | <0.001          |
| Maximum HU (median, range)                                                         | 144 (113, 249)                                              | 238.5 (-155, 3071)                                       | <0.001          |
| Minimum HU (median, range)                                                         | 23.5 (-362, 78)                                             | 24.0 (-370, 479)                                         | 0.606           |
| Difference between maximum and minimum HU (median, range)                          | 128.5 (72, 570)                                             | 223.5 (-91, 3219)                                        | <0.001          |

|                                                                                          |                    |                       |        |
|------------------------------------------------------------------------------------------|--------------------|-----------------------|--------|
| <b>Perimeter of air around appendicolith</b> (median, range)                             |                    |                       |        |
| Length (mm)                                                                              | 0 (0, 0.8)         | 0 (0, 1.6)            | 0.514  |
| % of air compared with appendicolith                                                     | 0 (0, 37.8)        | 0 (0, 77.1)           | 0.550  |
| <b>HU of surrounding soft tissues</b> (median, range)                                    |                    |                       |        |
| Noncontrast phase                                                                        | 36.2 (10.0, 62.0)  | 34.3 (-86.8, 120.0)   | 0.379  |
| Portovenous phase                                                                        | 52.6 (16.0, 110.0) | 44.8 (-43.1, 182.2)   | 0.028  |
| Difference between HU of appendicolith and surrounding soft tissues in noncontrast phase | 58.6 (-44.6, 91.0) | 98.9 (-112, 1498.4)   | <0.001 |
| Difference between HU of appendicolith and surrounding soft tissues in portovenous phase | 34.5 (-98.7, 82.7) | 83.5 (-180.5, 1479.6) | <0.001 |

HU = Hounsfield Unit

**Supplementary Material 3: Computed tomographic characteristics of appendicitis with appendicoliths not shown on portovenous phase (n=24)**

| Case No. | Final diagnosis | CT diagnosis  | Wall enhancement defect | Moderate-severe fat stranding | Fluid collection | Extraluminal air |
|----------|-----------------|---------------|-------------------------|-------------------------------|------------------|------------------|
| 24       | Uncomplicated   | Uncomplicated | Yes                     | Yes                           | Yes              | Yes              |
| 27       | Complicated     | Complicated   | Yes                     | Yes                           | Yes              | Yes              |
| 51       | Complicated     | Complicated   | Yes                     | Yes                           | Yes              | Yes              |
| 55       | Complicated     | Complicated   | Yes                     | Yes                           | Yes              | Yes              |
| 99       | Complicated     | Uncomplicated | No                      | Yes                           | No               | No               |
| 102      | Complicated     | Complicated   | Yes                     | Yes                           | No               | No               |
| 115      | Complicated     | Complicated   | Yes                     | Yes                           | No               | No               |
| 119      | Complicated     | Complicated   | Yes                     | Yes                           | Yes              | Yes              |
| 131      | Complicated     | Complicated   | Yes                     | Yes                           | No               | Yes              |
| 149      | Complicated     | Uncomplicated | No                      | Yes                           | No               | No               |
| 168      | Complicated     | Complicated   | Yes                     | Yes                           | Yes              | Yes              |
| 169      | Uncomplicated   | Complicated   | Yes                     | Yes                           | No               | No               |
| 174      | Uncomplicated   | Uncomplicated | No                      | No                            | No               | No               |
| 175      | Complicated     | Complicated   | Yes                     | Yes                           | Yes              | Yes              |
| 210      | Uncomplicated   | Complicated   | Yes                     | Yes                           | No               | No               |
| 214      | Complicated     | Complicated   | No                      | Yes                           | No               | No               |
| 219      | Complicated     | Complicated   | Yes                     | Yes                           | Yes              | Yes              |
| 223      | Uncomplicated   | Uncomplicated | No                      | Yes                           | No               | No               |
| 226      | Complicated     | Complicated   | Yes                     | Yes                           | No               | No               |
| 232      | Complicated     | Complicated   | Yes                     | Yes                           | Yes              | No               |
| 241      | Uncomplicated   | Complicated   | Yes                     | Yes                           | Yes              | Yes              |
| 246      | Complicated     | Complicated   | Yes                     | Yes                           | Yes              | Yes              |
| 250      | Uncomplicated   | Uncomplicated | No                      | No                            | No               | No               |
| 290      | Uncomplicated   | Uncomplicated | No                      | Yes                           | No               | No               |
